# Supplementary material for: Methylation Density Pattern of KEAP1 Gene in Lung Cancer Cell Lines Detected by Quantitative Methylation Specific PCR and Pyrosequencing
Source: MDPI journal article supplement (doi:10.3390/ijms20112697), 2019-05-31
Supplement: s1 [file s1]

Supplemental Materials

Supplemental Figure

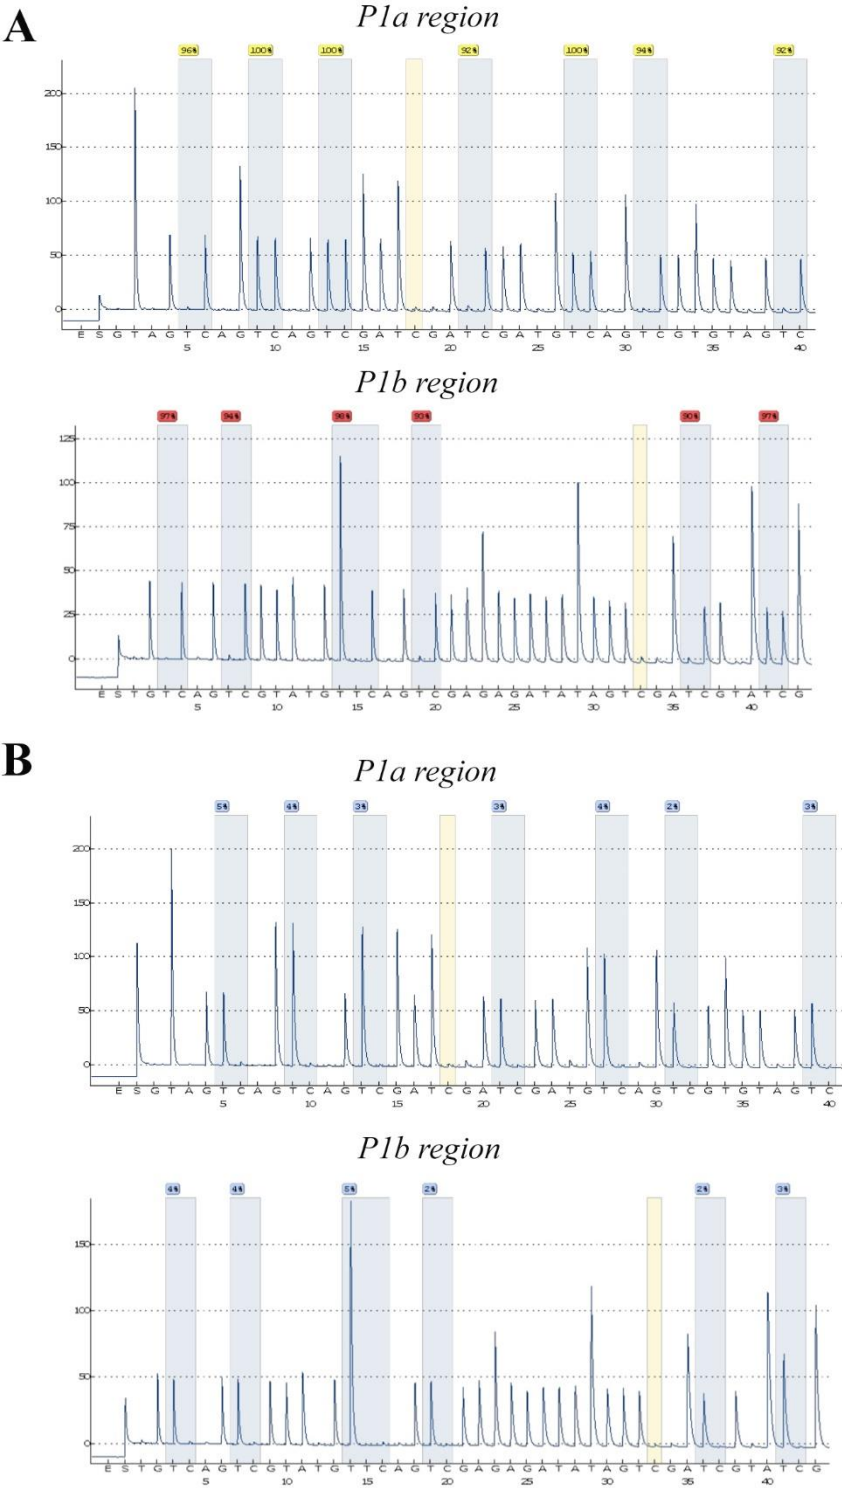

**Supplemental Figure S1.** Representative *KEAP1* promoter methylation pyrograms after DNA bisulfite conversion obtained with the first (1–7 CpGs, P1a region) and second reactions of primers (8–13 CpGs, P1b region) respectively. (A) Universal Methylated Human DNA; (B) Universal

Unmethylated Human DNA. X axis shows the dispensation order; Percentages indicate the proportion of C (cytosine).

### Supplemental Table

**Table S1 (A).** Pyrosequencing methylation levels at P1 KEAP1 promoter region in normal cell lines. \*methylation levels are reported as mean±SD of methylation levels of 13 CpGs mapped in the P1 promoter region. Each methylation value is expressed in %.

| Cell Lines | Mean (%)* | 2SD         | Mean+2SD (%)* |
|------------|-----------|-------------|---------------|
| MRC5       | 19.6      | 4.545327271 | 24.14532727   |
| BEAS-2B    | 23.12     | 3.740053476 | 26.86005348   |

**Table S1 (B).** Pyrosequencing methylation level of each single CpG site at P1 KEAP1 promoter region in normal lung cells.

| Cell lines | Cp G1 | Cp G2 | Cp G3 | Cp G4 | Cp G5 | Cp G6 | Cp G7 | Cp G8 | Cp G9 | CpG 10 | CpG 11 | CpG 12 | CpG 13 |
|------------|-------|-------|-------|-------|-------|-------|-------|-------|-------|--------|--------|--------|--------|
| MRC5       | 37.0  | 34.6  | 39.2  | 17.0  | 22.0  | 23.8  | 17.8  | 17.6  | 16.4  | 11.2   | 8.8    | 4.6    | 4.8    |
| BEAS-2B    | 56.4  | 32.8  | 40.4  | 13.6  | 51.8  | 49.0  | 20.6  | 8.8   | 9.6   | 7.4    | 4.6    | 2.6    | 3.2    |
| mean       | 46.7  | 33.7  | 39.8  | 15.3  | 36.9  | 36.4  | 19.2  | 13.2  | 13.0  | 9.3    | 6.7    | 3.6    | 4.0    |
| 2SD        | 27.4  | 2.5   | 1.7   | 4.8   | 42.1  | 35.6  | 4.0   | 12.4  | 9.6   | 5.4    | 5.9    | 2.8    | 2.3    |
| mean+2SD   | 74.1  | 36.2  | 41.5  | 20.1  | 79.0  | 72.0  | 23.2  | 25.6  | 22.6  | 14.7   | 12.6   | 6.4    | 6.3    |

\*methylation values are as % for each 13 CpGs mapped in the P1 promoter region of KEAP1. Mean is referred to mean of values obtained for MRC5 and BEAS-2B by pyrosequencing.
